# Supplementary material for: Serotype Replacement after Introduction of 10-Valent and 13-Valent Pneumococcal Conjugate Vaccines in 10 Countries, Europe
Source: Emerg Infect Dis. 2022 Jan;28(1):127–38. doi: 10.3201/eid2801.210734 (PMC8714201; doi:10.3201/eid2801.210734)
Supplement: Appendix — Additional information about serotype replacement after introduction of 10-valent and 13-valent pneumococcal conjugate vaccines in 10 countries, Europe [file 21-0734-Techapp-s1.pdf]

# Serotype Replacement after Introduction of 10-Valent and 13-Valent Pneumococcal Conjugate Vaccines in 10 Countries, Europe

## Appendix

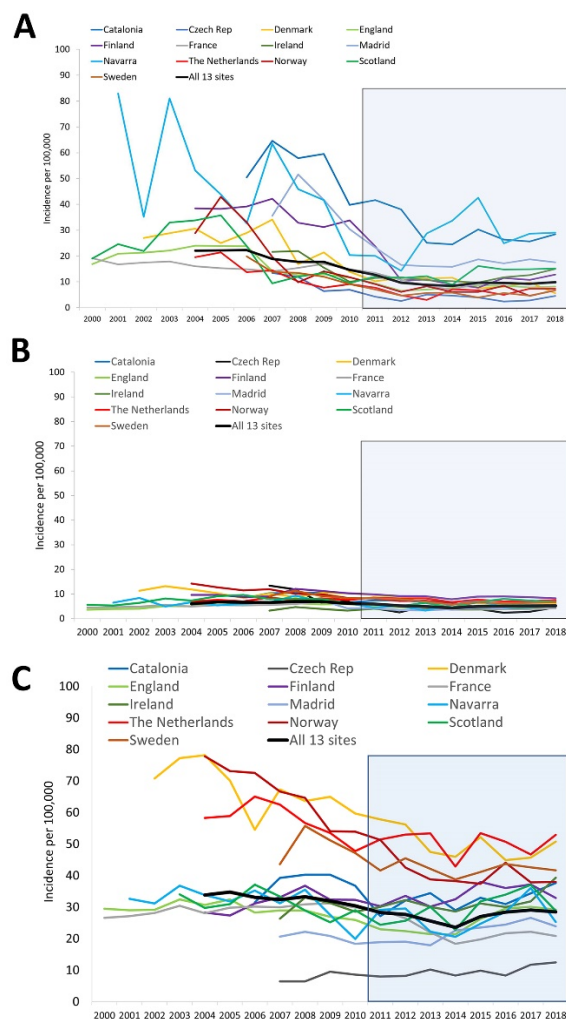

**Appendix Figure 1.** Overall incidence rates of invasive pneumococcal disease, pooled and per site, by year (2000–2018), 13 SpIDnet sites, Europe. A) Incidence rates in children <5 years of age, B) in persons 5–64 years of age, C) in persons  $\geq 65$  years of age. Light blue square indicates period of PCV10/PCV13 program.

**A**

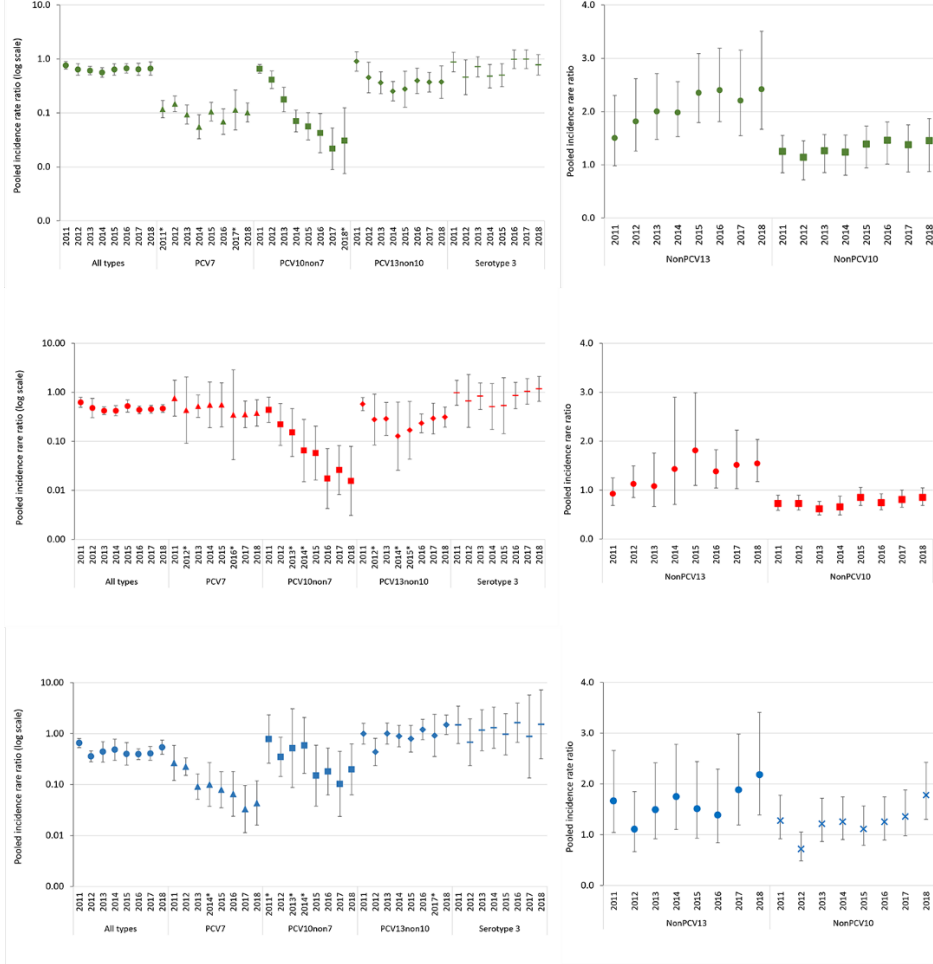

**B**

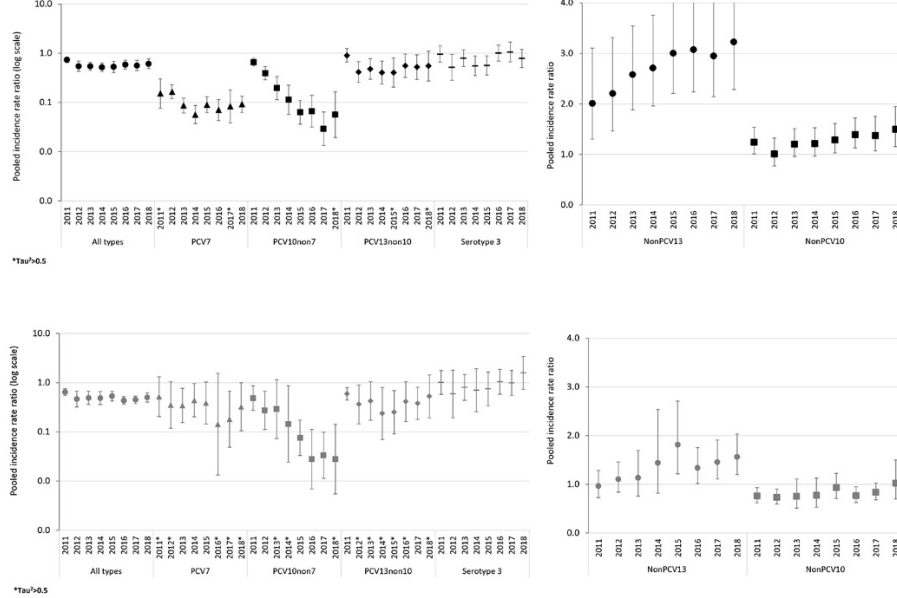

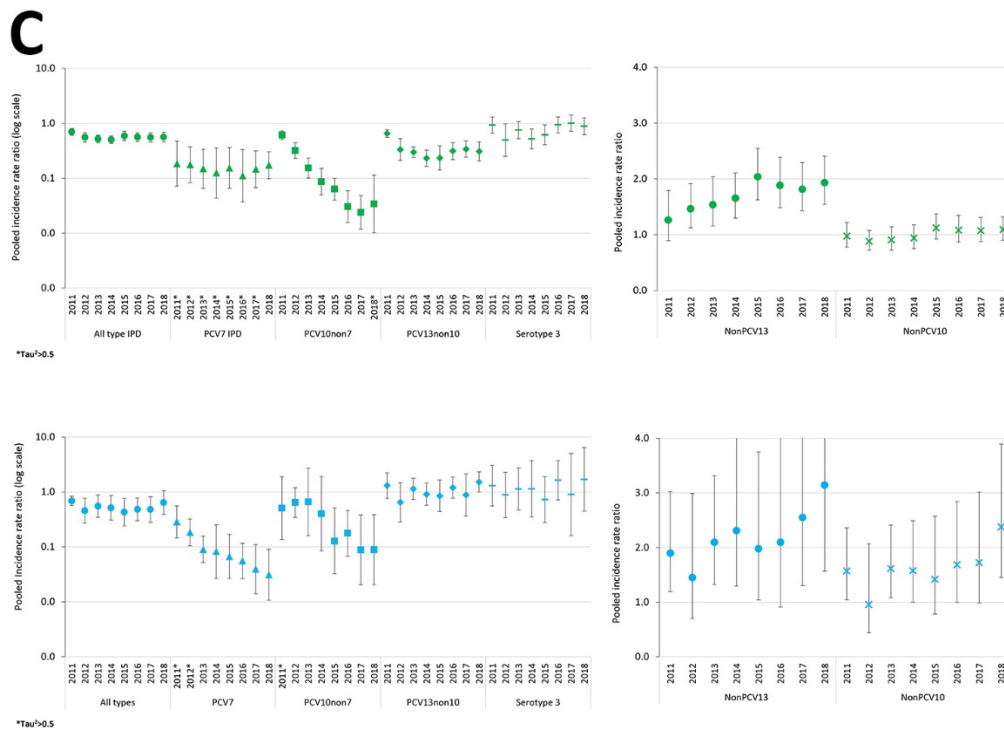

**Appendix Figure 2.** Pooled incidence rate ratio (IRR) of invasive pneumococcal disease in children <5 years of age per year of PCV10/PCV13 year program (2011–2018) compared with the PCV7 period in 13 SpIDnet sites, Europe. A) Pooled IRR by vaccine policy (top: universal PCV13 vaccination, 6 sites; middle: 3 sites in Spain; bottom: universal vaccination with PCV10 with or without PCV13, 4 sites). B) Pooled IRR by level of uptake (top: high uptake, 9 sites; bottom: moderate uptake, 4 sites). C) Pooled IRR by duration of PCV7 vaccination (top:  $\geq 3$  years PCV7, 9 sites; bottom: <3 years PCV7, 4 sites). PCV, pneumococcal conjugate vaccine.

**A**

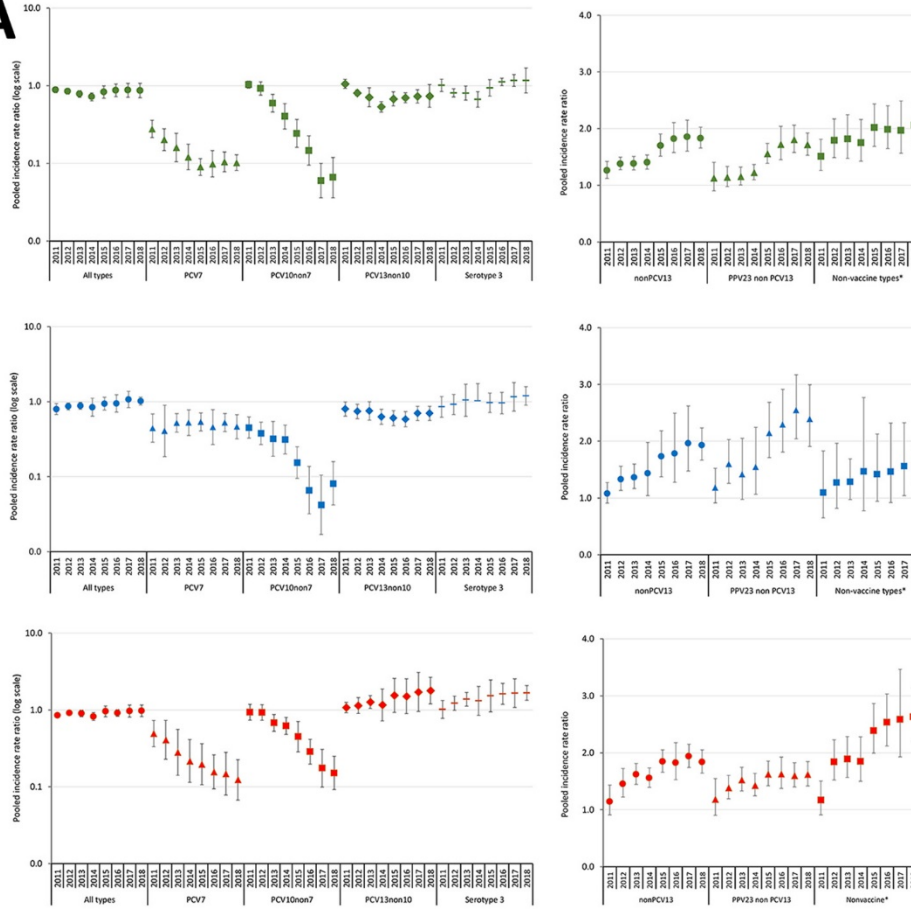

**B**

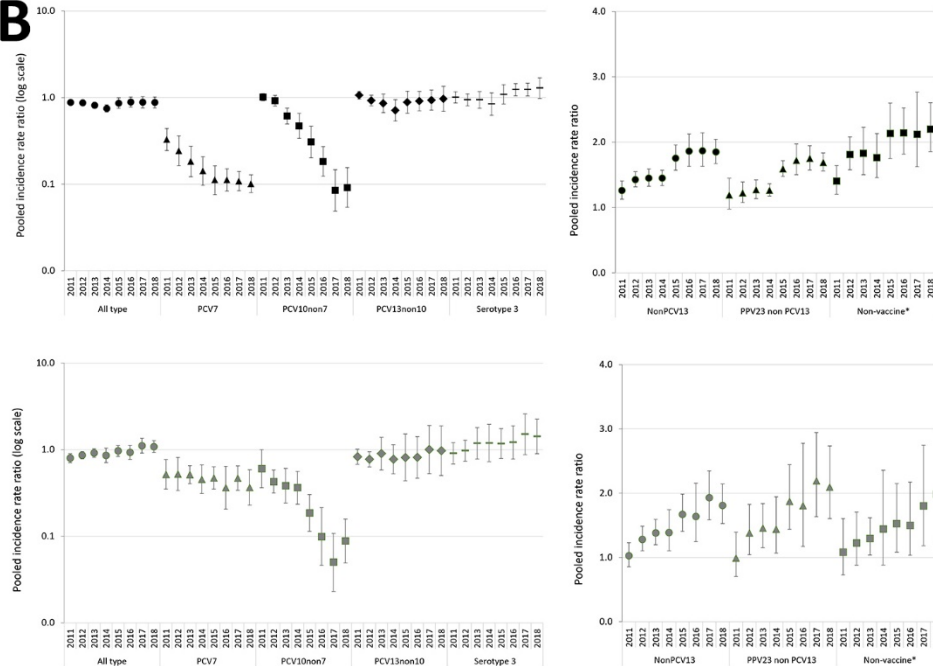

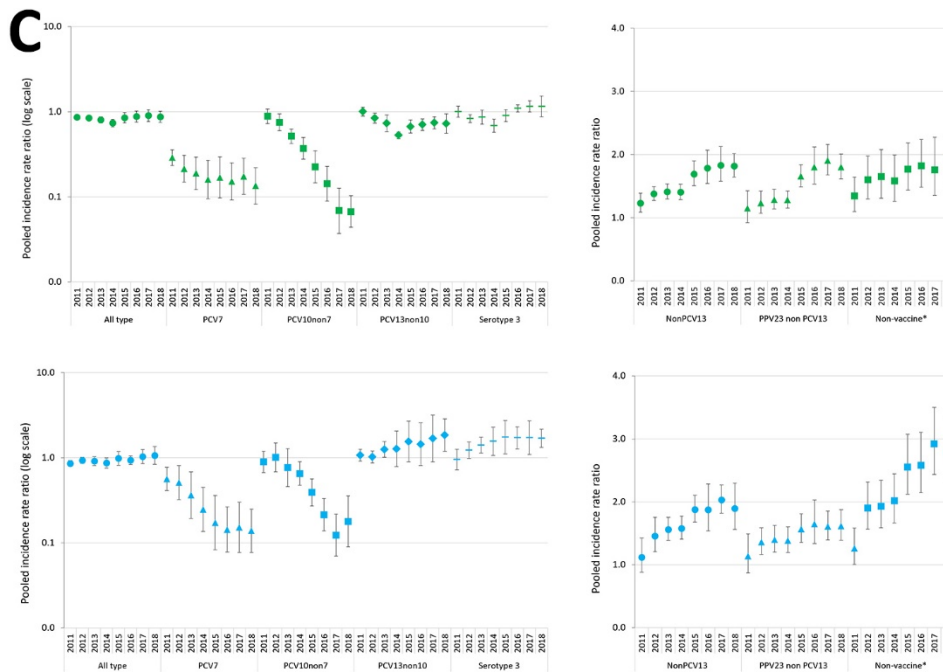

**Appendix Figure 3.** Pooled incidence rate ratio (IRR) of invasive pneumococcal disease in adults  $\geq 65$  years of age per year of PCV10/PCV13 program (2011–2018) compared with the PCV7 period. A) Pooled IRR by vaccine policy (top: universal PCV13 vaccination, 6 sites; middle: 3 sites in Spain; bottom: universal vaccination with PCV10 with or without PCV13, 4 sites). B) Pooled IRR by level of uptake (top: high uptake, 9 sites; bottom: moderate uptake, 4 sites). C) Pooled IRR by duration of PCV7 vaccination (top:  $\geq 3$  years PCV7, 9 sites; bottom:  $< 3$  years PCV7, 4 sites). \*Serotypes not in PPV23 and not in PCV13. PCV, pneumococcal conjugate vaccine; PPV, pneumococcal polysaccharide vaccine.
